# Supplementary material
Source: PubMed Central journal article supplement (PMC9509662)
Supplement: NIHMS1831207-supplement-Supplemental_Figure_II_Permission.pdf [file NIHMS1831207-supplement-Supplemental_Figure_II_Permission.pdf]

### Image quality assessment of the right ventricle with three different delayed enhancement sequences in patients suspected of ARVC/D

Author: A. S. Plaisier et al

Publication: International Journal of Cardiovascular Imaging

Publisher: Springer Nature

Date: Apr 19, 2011

*Copyright © 2011, The Author(s)*

#### Creative Commons

The request you have made is considered to be non-commercial/educational. As the article you have requested has been distributed under a Creative Commons license (Attribution-Noncommercial), you may reuse this material for non-commercial/educational purposes without obtaining additional permission from Springer Nature, providing that the author and the original source of publication are fully acknowledged (please see the article itself for the license version number). You may reuse this material without obtaining permission from Springer Nature, providing that the author and the original source of publication are fully acknowledged, as per the terms of the license. For license terms, please see <http://creativecommons.org/>

BACK

CLOSE WINDOW
